# Supplementary material
Source: Springer Nature journal article supplement (https://www.springermedizin.de/resource/supplementary/13221_2014_85_MOESM2_ESM.pdf/9680930)

Figure S1

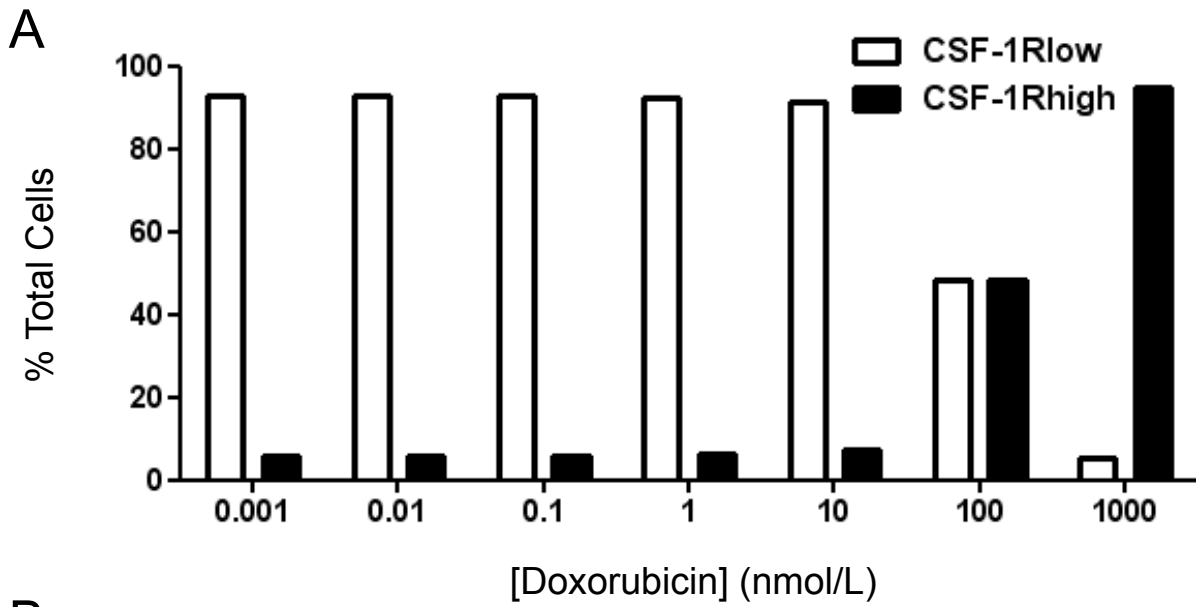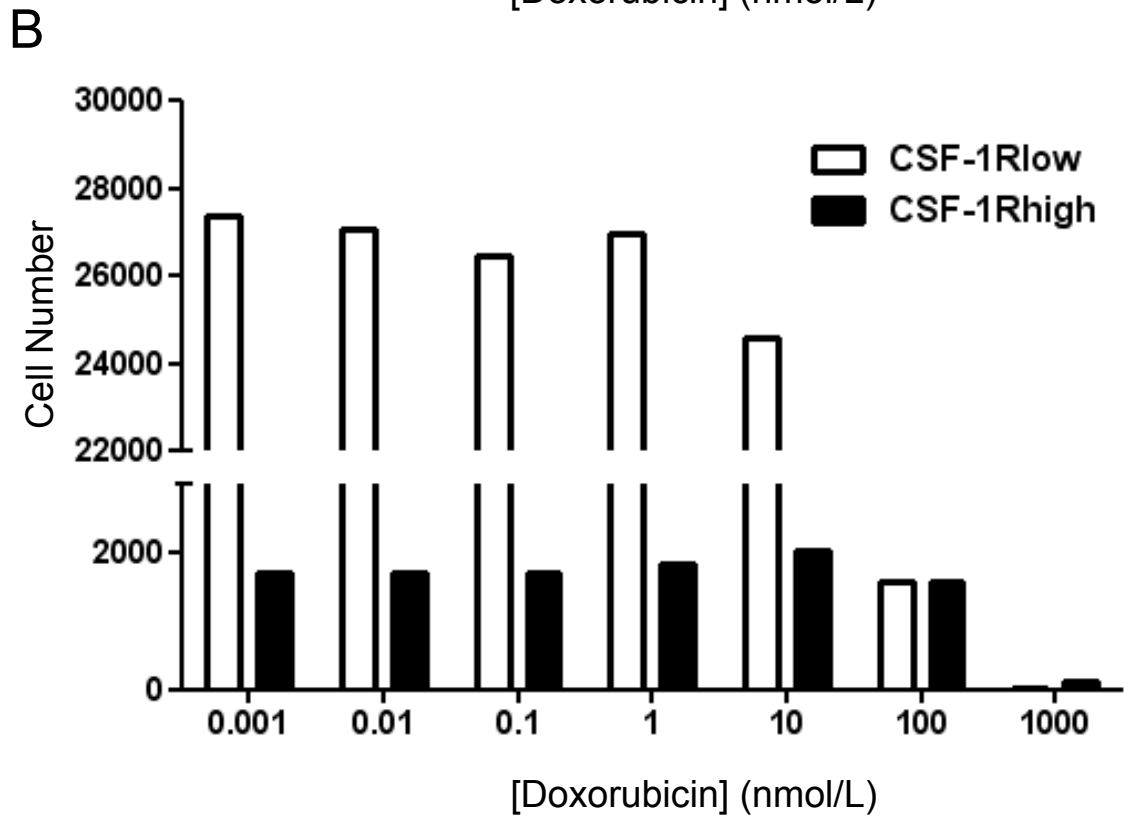

Figure S2

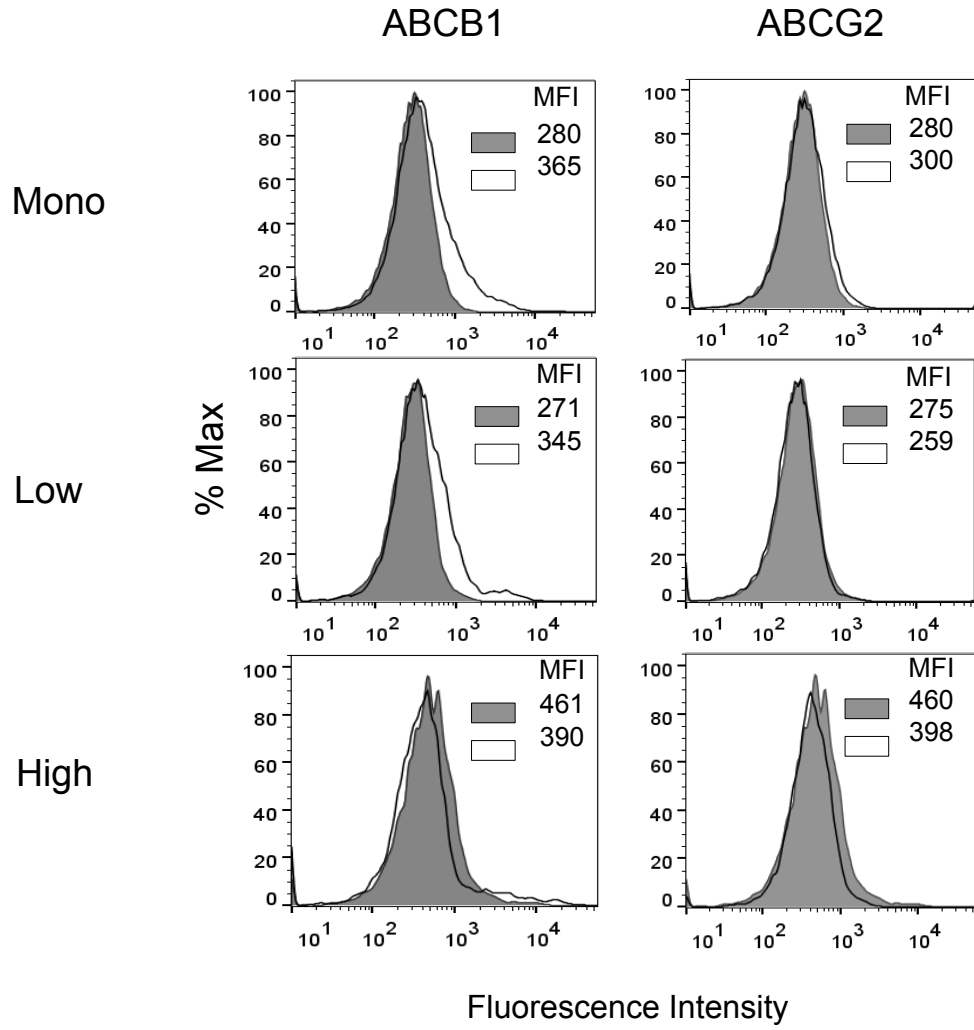

Figure S3

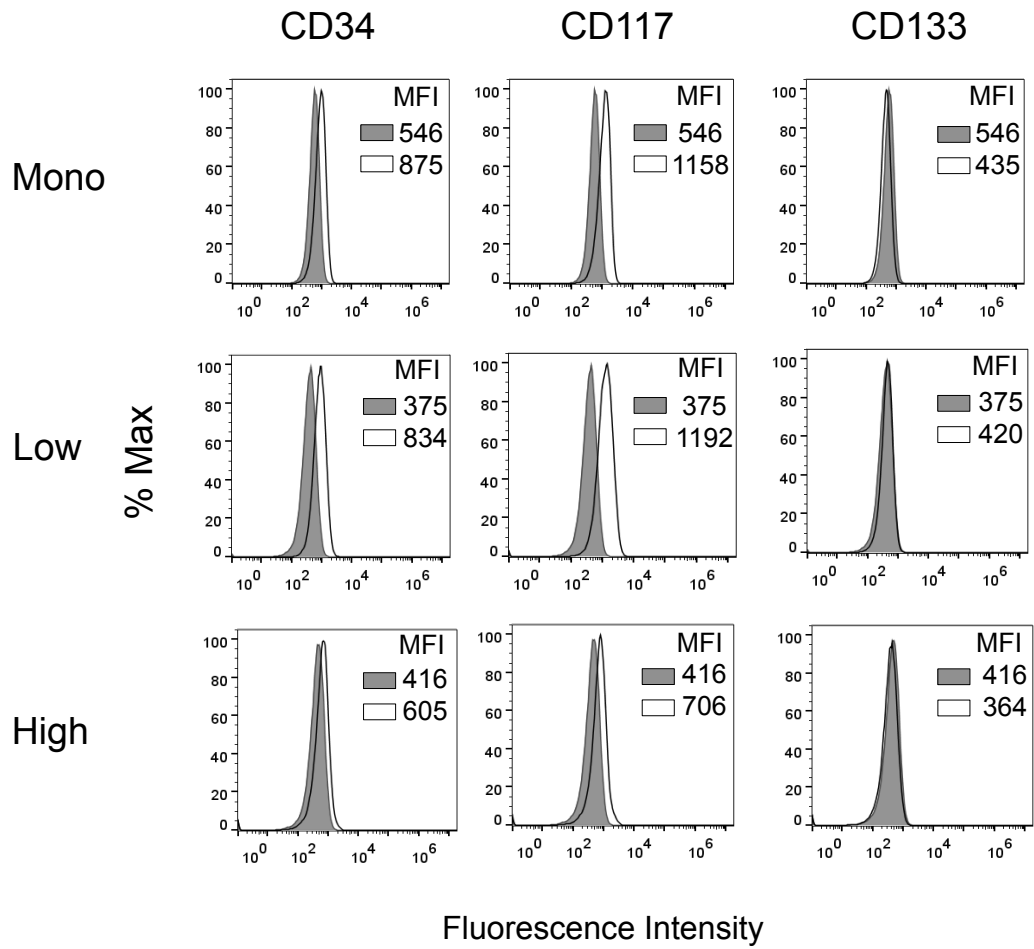

Supplement: MOESM2 [file 9680930]
